# Supplementary material
Source: Royal Society of Chemistry journal article supplement (doi:10.1039/d6bm00101g)

## Supporting Information

### PINK1/Parkin-Dependent Mitophagy Regulates Macrophage Polarization and Osseointegration of Titanium Implant in Inflammatory Microenvironments

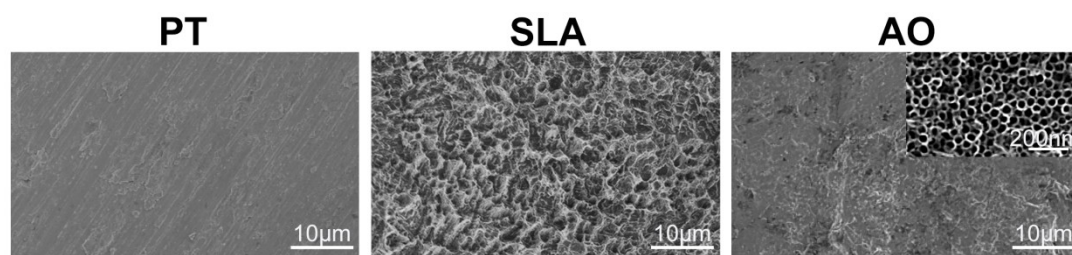

**Fig. S1** SEM images of different titanium (Ti) surfaces. PT: polished Ti; SLA: sandblasted/acid-etched Ti; AO: anodized Ti. Scale bars: 10µm; 200nm (high-magnification insets).

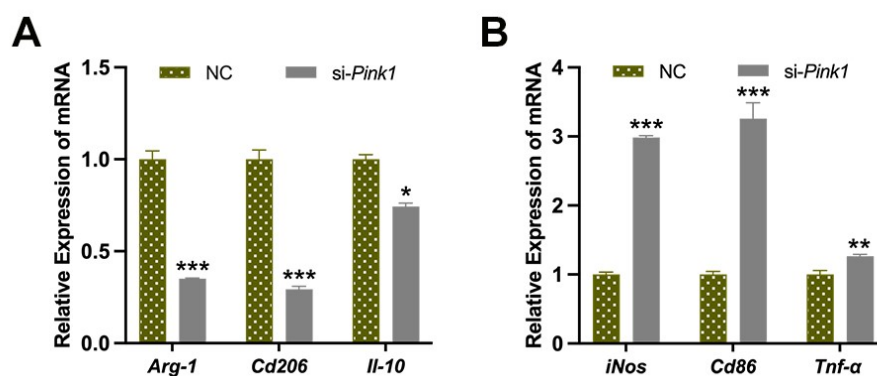

**Fig. S2** qRT-PCR analysis of relative mRNA expression levels of M2 (A) and M1 (B) marker genes.

\* $p < 0.05$ , \*\* $p < 0.01$ , \*\*\* $p < 0.001$ .

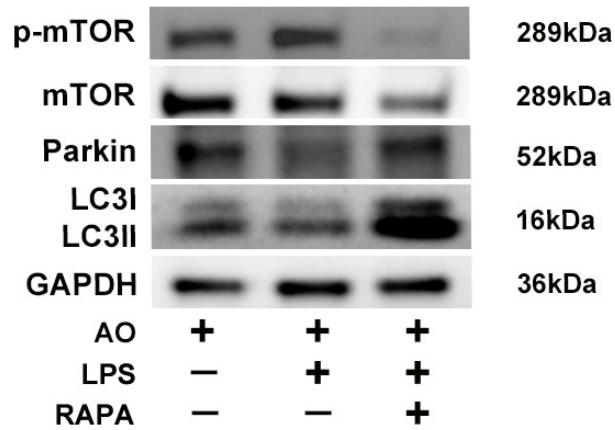

**Fig. S3** The protein expressions of p-mTOR, mTOR, Parkin and LC3B in macrophages from AO, AO+LPS and AO+LPS+RAPA groups by Western blotting. GAPDH was utilized as an internal reference. LPS: lipopolysaccharide. RAPA: rapamycin.

**Table S1.** Primer sequences of related genes for qRT-PCR

| Gene          | Forward primer sequence (5'-3') | Reverse primer sequence (5'-3') |
|---------------|---------------------------------|---------------------------------|
| <i>Gapdh</i>  | GTGAAGGTCGGTGTGAACGG            | TCCTGGAAGATGGTGATGGG            |
| <i>Arg-1</i>  | CTCCAAGCCAAAGTCCTTAGAG          | AGGAGCTGTCATTAGGGACATC          |
| <i>Cd206</i>  | CTCTGTTCAGCTATTGGACGC           | CGGAATTTCTGGGATTCAGCTTC         |
| <i>Il-10</i>  | GCTCTTACTGACTGGCATGAG           | CGCAGCTCTAGGAGCATGTG            |
| <i>iNos</i>   | GTTCTCAGCCCAACAATAACAAGA        | GTGGACGGGTCGATGTCAC             |
| <i>Cd86</i>   | TGTTTCCGTGGAGACGCAAG            | TTGAGCCTTTGTAAATGGGCA           |
| <i>Tnf-α</i>  | CCCTCACACTCAGATCATCTTCT         | GCTACGACGTGGGCTACAG             |
| <i>Pink1</i>  | TTGCAATGCCGCTGTGTATG            | TGGAGGAACCTGCCGAGATA            |
| <i>Parkin</i> | ATCGGCAGTTTGTCCACGAT            | GTGAGTCGCAATCCCCCTCA            |

*Beclin-1* ATGGAGGGGTCTAAGGCGTC

TCCTCTCCTGAGTTAGCCTCT

*Lamp1* TTCCAGTCTTGTGTTGGCGT

ATGCCAGTGTACAACCCAC

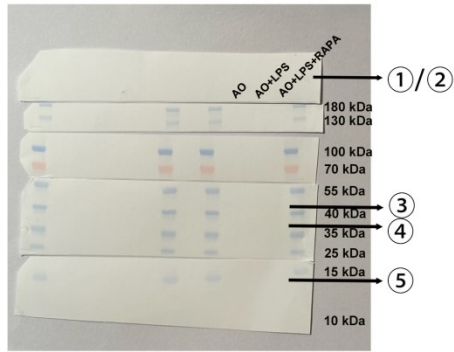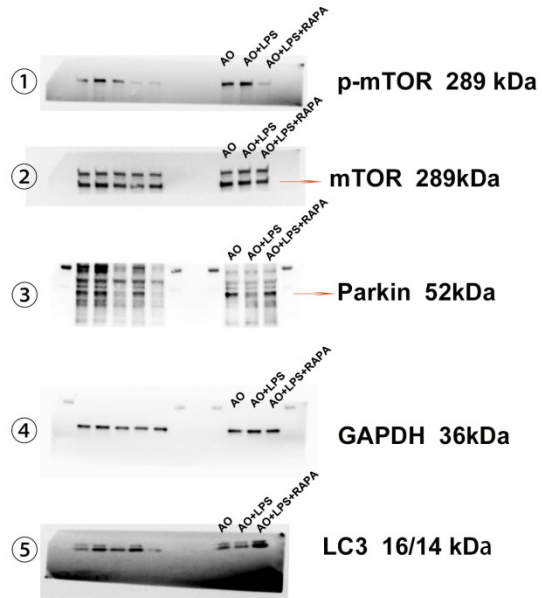

Supplement: d6bm00101g1.pdf [file d6bm00101g1.pdf]
